# Supplementary material for: Peripheral TIGIT+ T Follicular Helper Cells That Produce High Levels of Interleukin-21 via OX40 Represent Disease Activity in IgG4-Related Disease
Source: PubMed Central journal article supplement (PMC8079782; doi:10.3389/fimmu.2021.651357), 2021-04-14
Supplement: DataSheet_1.pdf [file DataSheet_1.pdf]

**Supplementary Table 1. Characteristics of 26 patients with untreated, active IgG4-related disease.**

| <b>Demographic features</b>                 |                  |
|---------------------------------------------|------------------|
| Age, years (median, range)                  | 64 (36-86)       |
| Sex, female (n, %)                          | 12 (52)          |
| Past atopic history (n, %)                  | 12 (52)          |
| Organ involvement (n, %)                    |                  |
| Lacrimal glands and orbits                  | 18 (78)          |
| Salivary glands                             | 14 (61)          |
| Lymph nodes                                 | 13 (57)          |
| Lungs                                       | 8 (35)           |
| Pancreas                                    | 4 (17)           |
| Kidneys                                     | 3 (13)           |
| Aorta                                       | 2 (9)            |
| Retroperitoneum                             | 2 (9)            |
| Skin                                        | 2 (9)            |
| Paravertebral mass                          | 2 (9)            |
| Clinical parameters (median, range)         |                  |
| Serum IgG (mg/dL)                           | 1734 (934-3593)  |
| Serum IgG4 (mg/dL)                          | 434 (65-2178)    |
| Serum IgE (IU/mL)                           | 310 (5-3300)     |
| Serum C-reactive protein (mg/dL)            | 0.04 (0.01-3.61) |
| Serum soluble interleukin-2 receptor (U/mL) | 375 (202-1963)   |
| Blood eosinophil count (cells/ $\mu$ L)     | 252 (44-1568)    |
| Number of affected organs                   | 3 (1-6)          |
| IgG4-RD responder index                     | 12 (6-21)        |

**Supplementary Table 2. Antibodies used for multi-color flow cytometry.**

| <b>Antibody</b> | <b>Conjugate</b> | <b>Clone</b> | <b>Supplier</b> |
|-----------------|------------------|--------------|-----------------|
| CD3             | FITC             | UCHT1        | BD Biosciences  |
| CD4             | BV786            | SK3          | BD Biosciences  |
| CD45RA          | BV711            | HI100        | BD Biosciences  |
| CXCR5           | BV421            | RF8B2        | BD Biosciences  |
| CXCR3           | PE               | 1C6          | BD Biosciences  |
| CCR6            | PE-CF594         | G034E3       | BioLegend       |
| TIGIT           | BV605            | A15153G      | BioLegend       |
| PD-L1           | BV510            | 29E.2A3      | BioLegend       |
| OX40            | APC/Cy7          | Ber-ACT35    | BioLegend       |
| PD-1            | PE               | EH12.1       | BD Pharmingen™  |

**Supplementary Table 3. Definition of blood CD4<sup>+</sup> T cell subsets.**

| <b>CD4<sup>+</sup> T cell subset</b> | <b>Definition</b>                                                                                                   |
|--------------------------------------|---------------------------------------------------------------------------------------------------------------------|
| Total CD4 <sup>+</sup> T cells       | CD3 <sup>+</sup> CD4 <sup>+</sup> cells                                                                             |
| Naïve CD4 <sup>+</sup> T cells       | CD3 <sup>+</sup> CD4 <sup>+</sup> CD45RA <sup>+</sup> cells                                                         |
| Memory CD4 <sup>+</sup> T cells      | CD3 <sup>+</sup> CD4 <sup>+</sup> CD45RA <sup>-</sup> cells                                                         |
| T helper (Th) cells                  | CD3 <sup>+</sup> CD4 <sup>+</sup> CD45RA <sup>-</sup> CXCR5 <sup>-</sup> cells                                      |
| Th1                                  | CD3 <sup>+</sup> CD4 <sup>+</sup> CD45RA <sup>-</sup> CXCR5 <sup>-</sup> CXCR3 <sup>+</sup> CCR6 <sup>-</sup> cells |
| Th2                                  | CD3 <sup>+</sup> CD4 <sup>+</sup> CD45RA <sup>-</sup> CXCR5 <sup>-</sup> CXCR3 <sup>-</sup> CCR6 <sup>-</sup> cells |
| Th17                                 | CD3 <sup>+</sup> CD4 <sup>+</sup> CD45RA <sup>-</sup> CXCR5 <sup>-</sup> CXCR3 <sup>-</sup> CCR6 <sup>+</sup> cells |
| T follicular helper (Tfh) cells      | CD3 <sup>+</sup> CD4 <sup>+</sup> CD45RA <sup>-</sup> CXCR5 <sup>+</sup> cells                                      |
| Tfh1                                 | CD3 <sup>+</sup> CD4 <sup>+</sup> CD45RA <sup>-</sup> CXCR5 <sup>+</sup> CXCR3 <sup>+</sup> CCR6 <sup>-</sup> cells |
| Tfh2                                 | CD3 <sup>+</sup> CD4 <sup>+</sup> CD45RA <sup>-</sup> CXCR5 <sup>+</sup> CXCR3 <sup>-</sup> CCR6 <sup>-</sup> cells |
| Tfh17                                | CD3 <sup>+</sup> CD4 <sup>+</sup> CD45RA <sup>-</sup> CXCR5 <sup>+</sup> CXCR3 <sup>-</sup> CCR6 <sup>+</sup> cells |

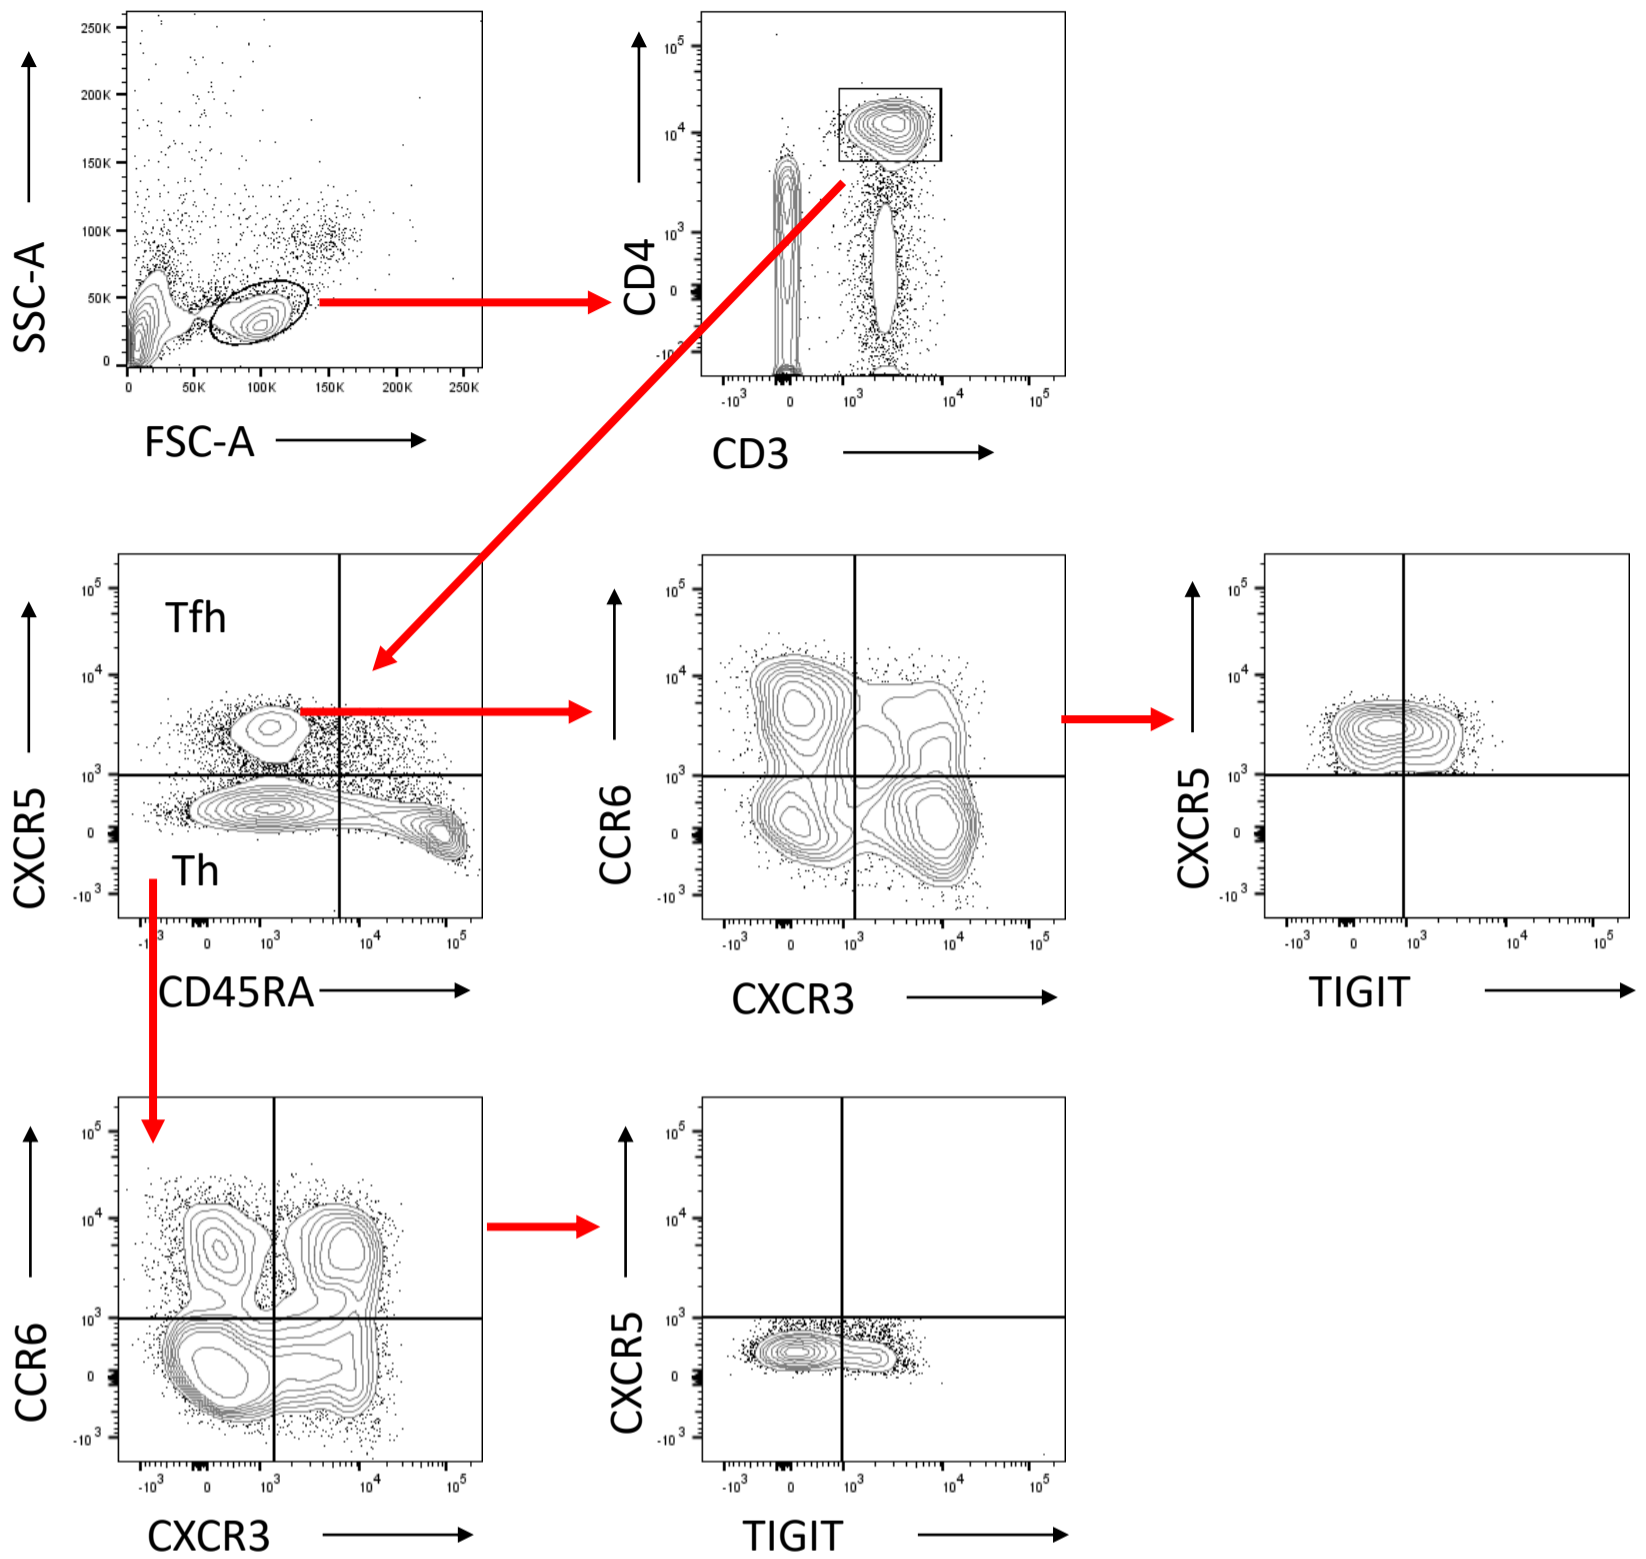

**Supplementary Figure 1. Gating strategy for TIGIT<sup>+</sup> cells in CD4<sup>+</sup>T cells.**

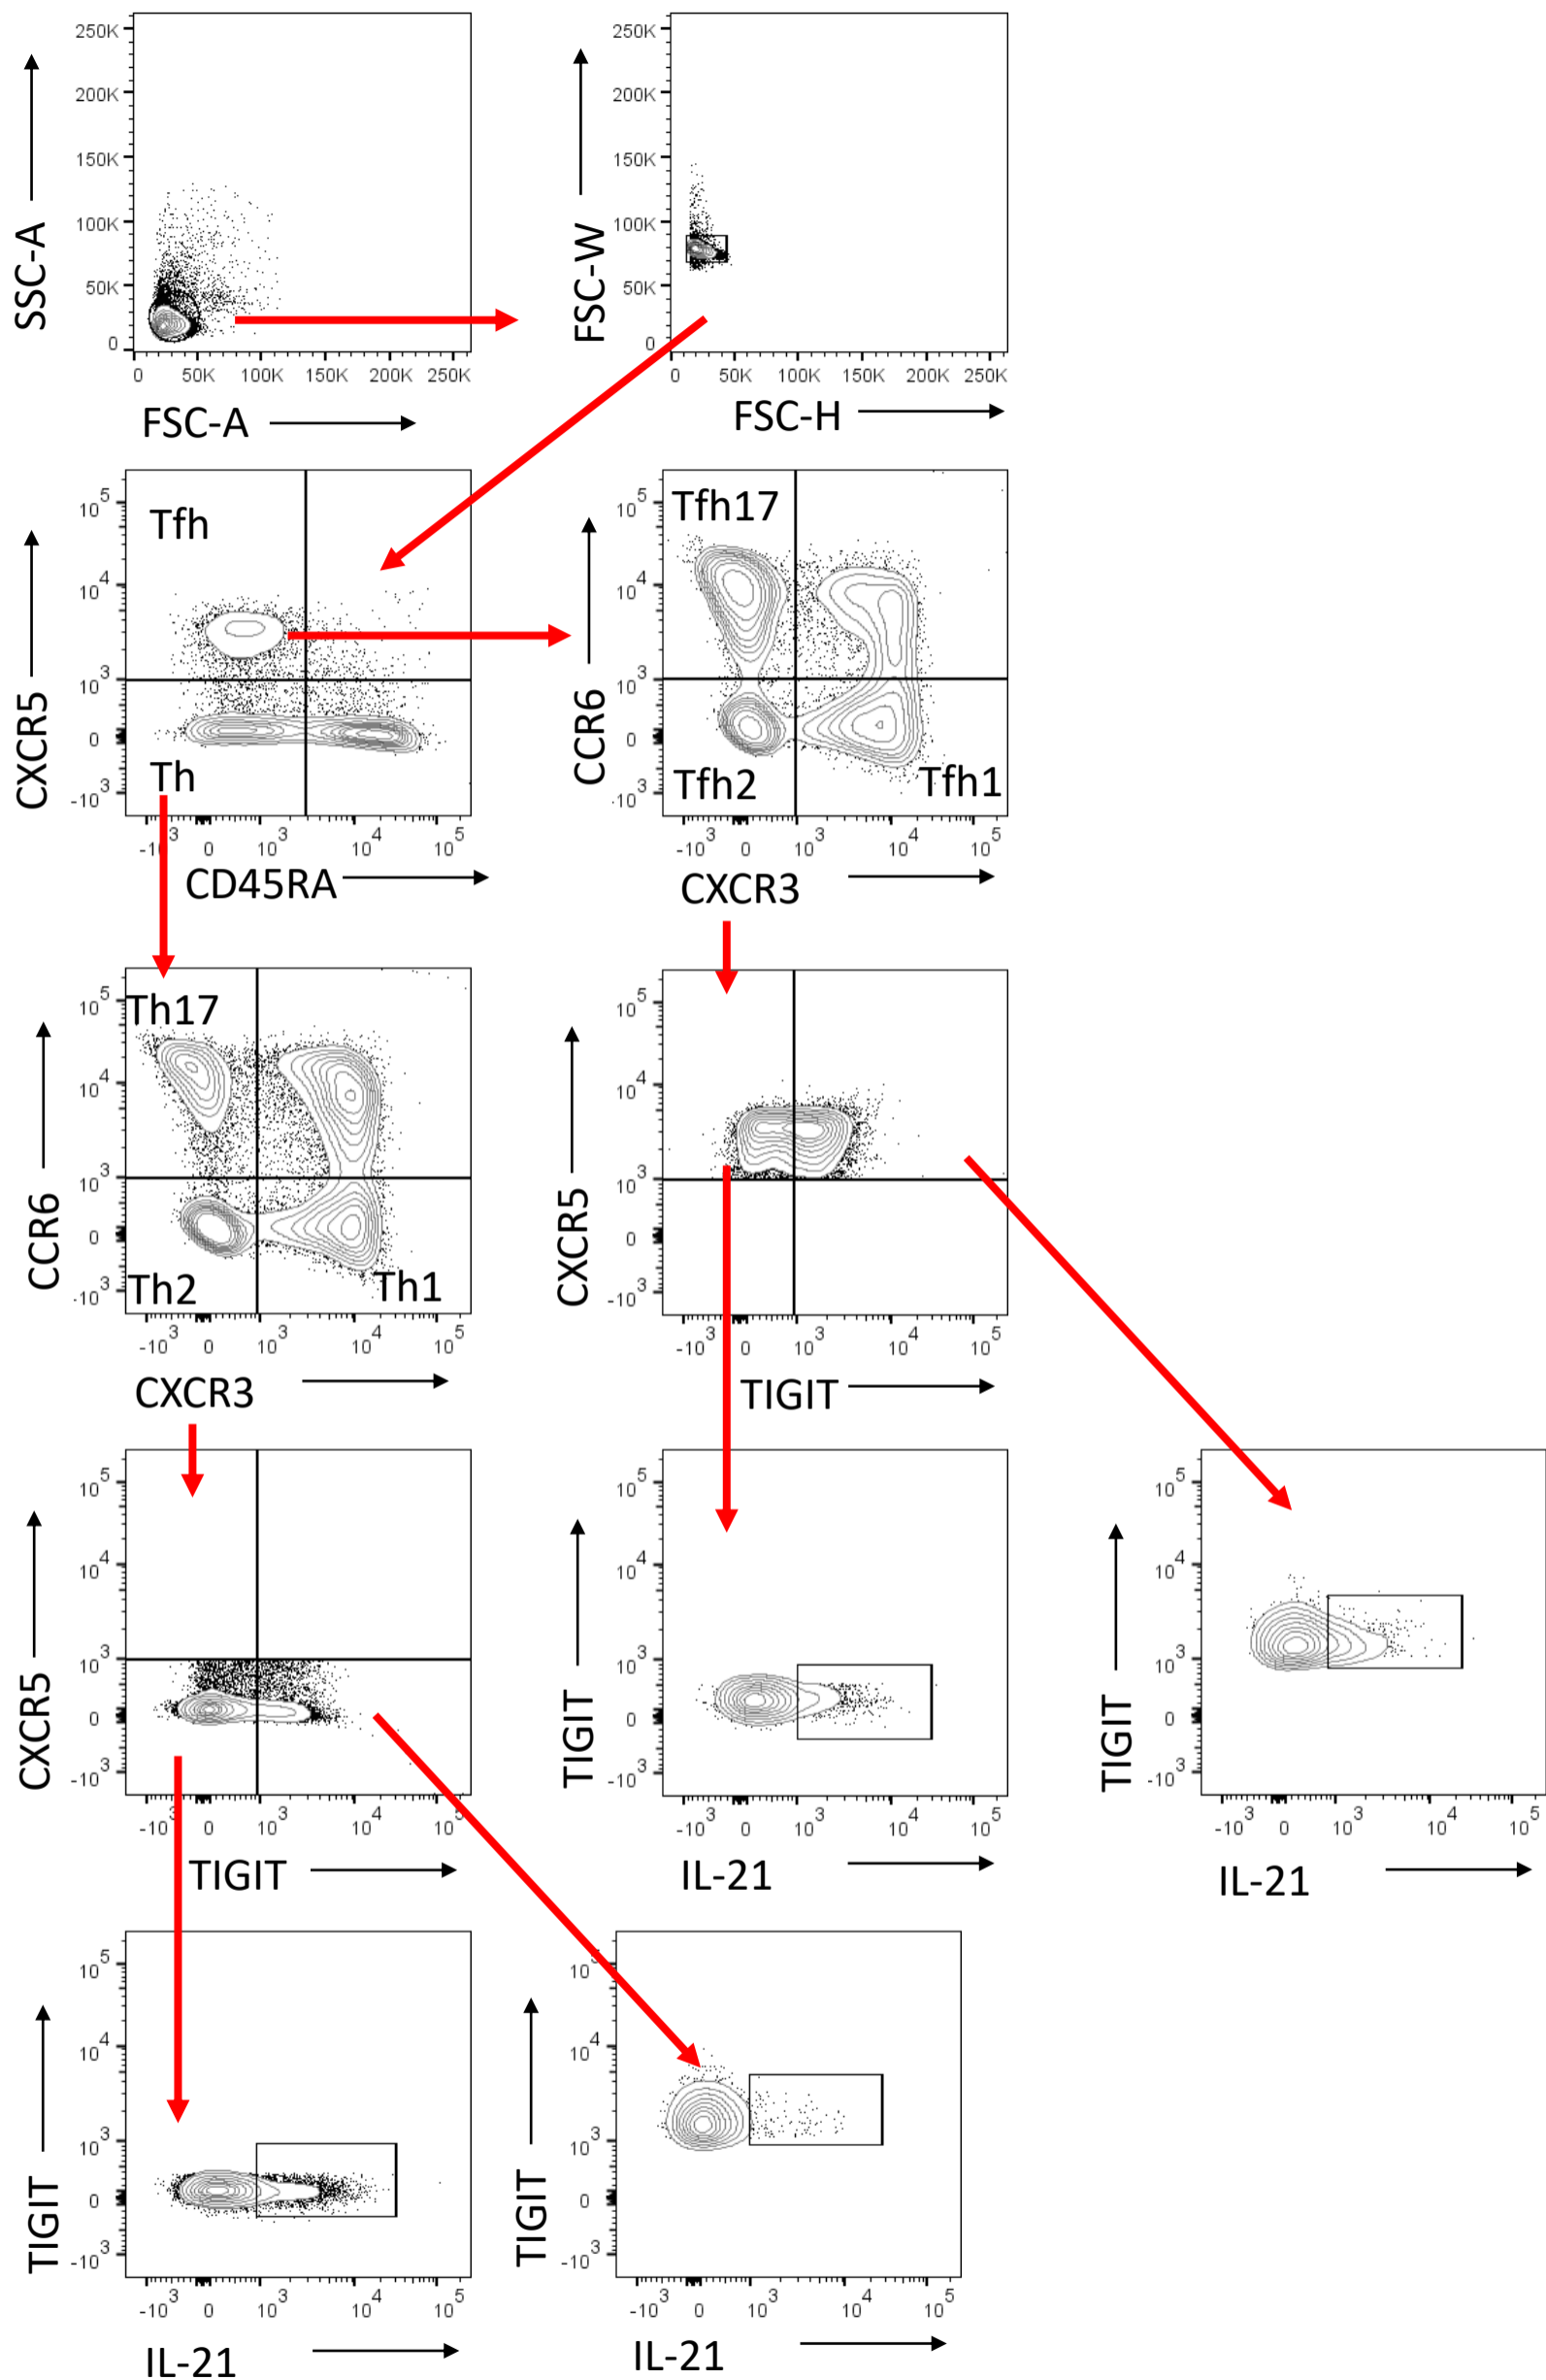

**Supplementary Figure 2. Gating strategy for IL-21+ cells in TIGIT+ and TIGIT- CD4+ T cells.**

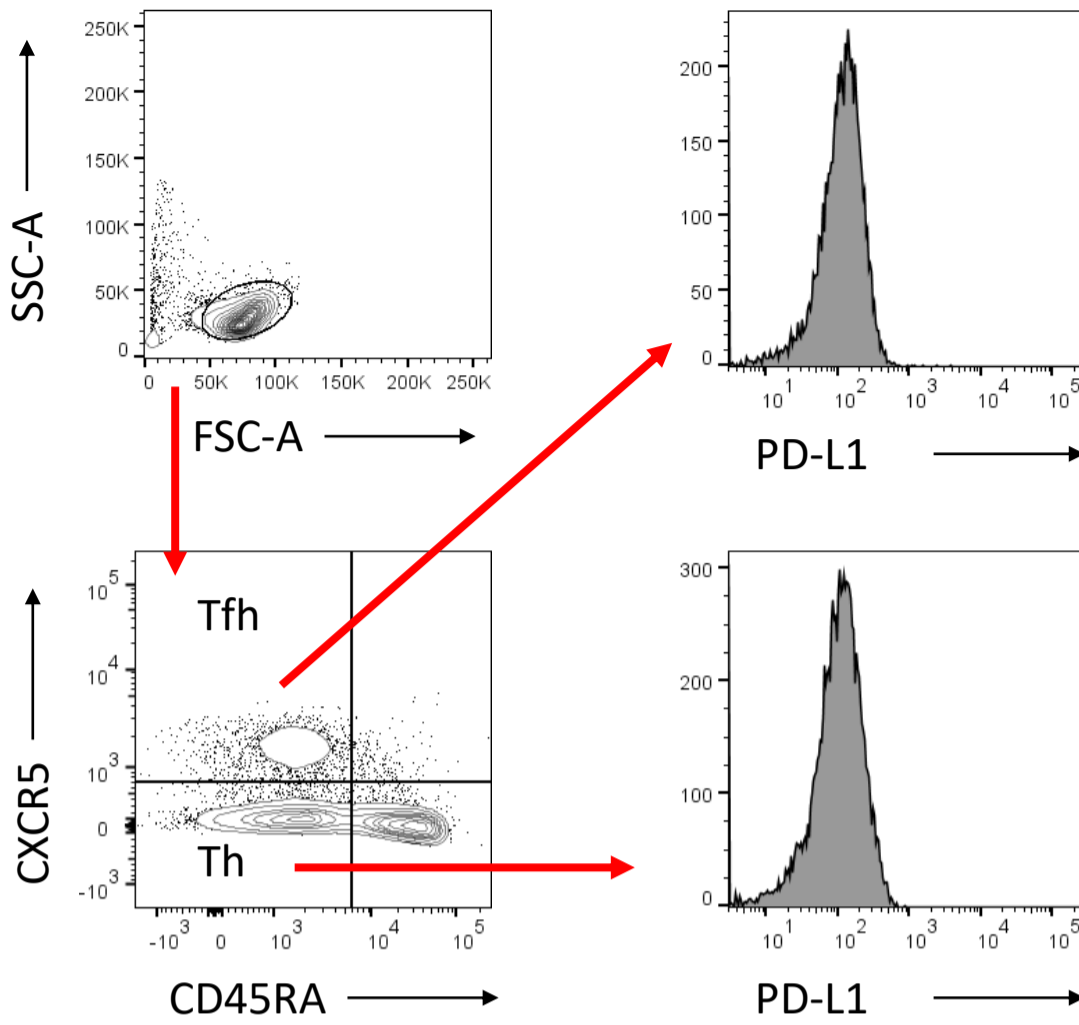

**Supplementary Figure 3. Gating strategy for PD-L1 expression in CD4<sup>+</sup>T cells.**

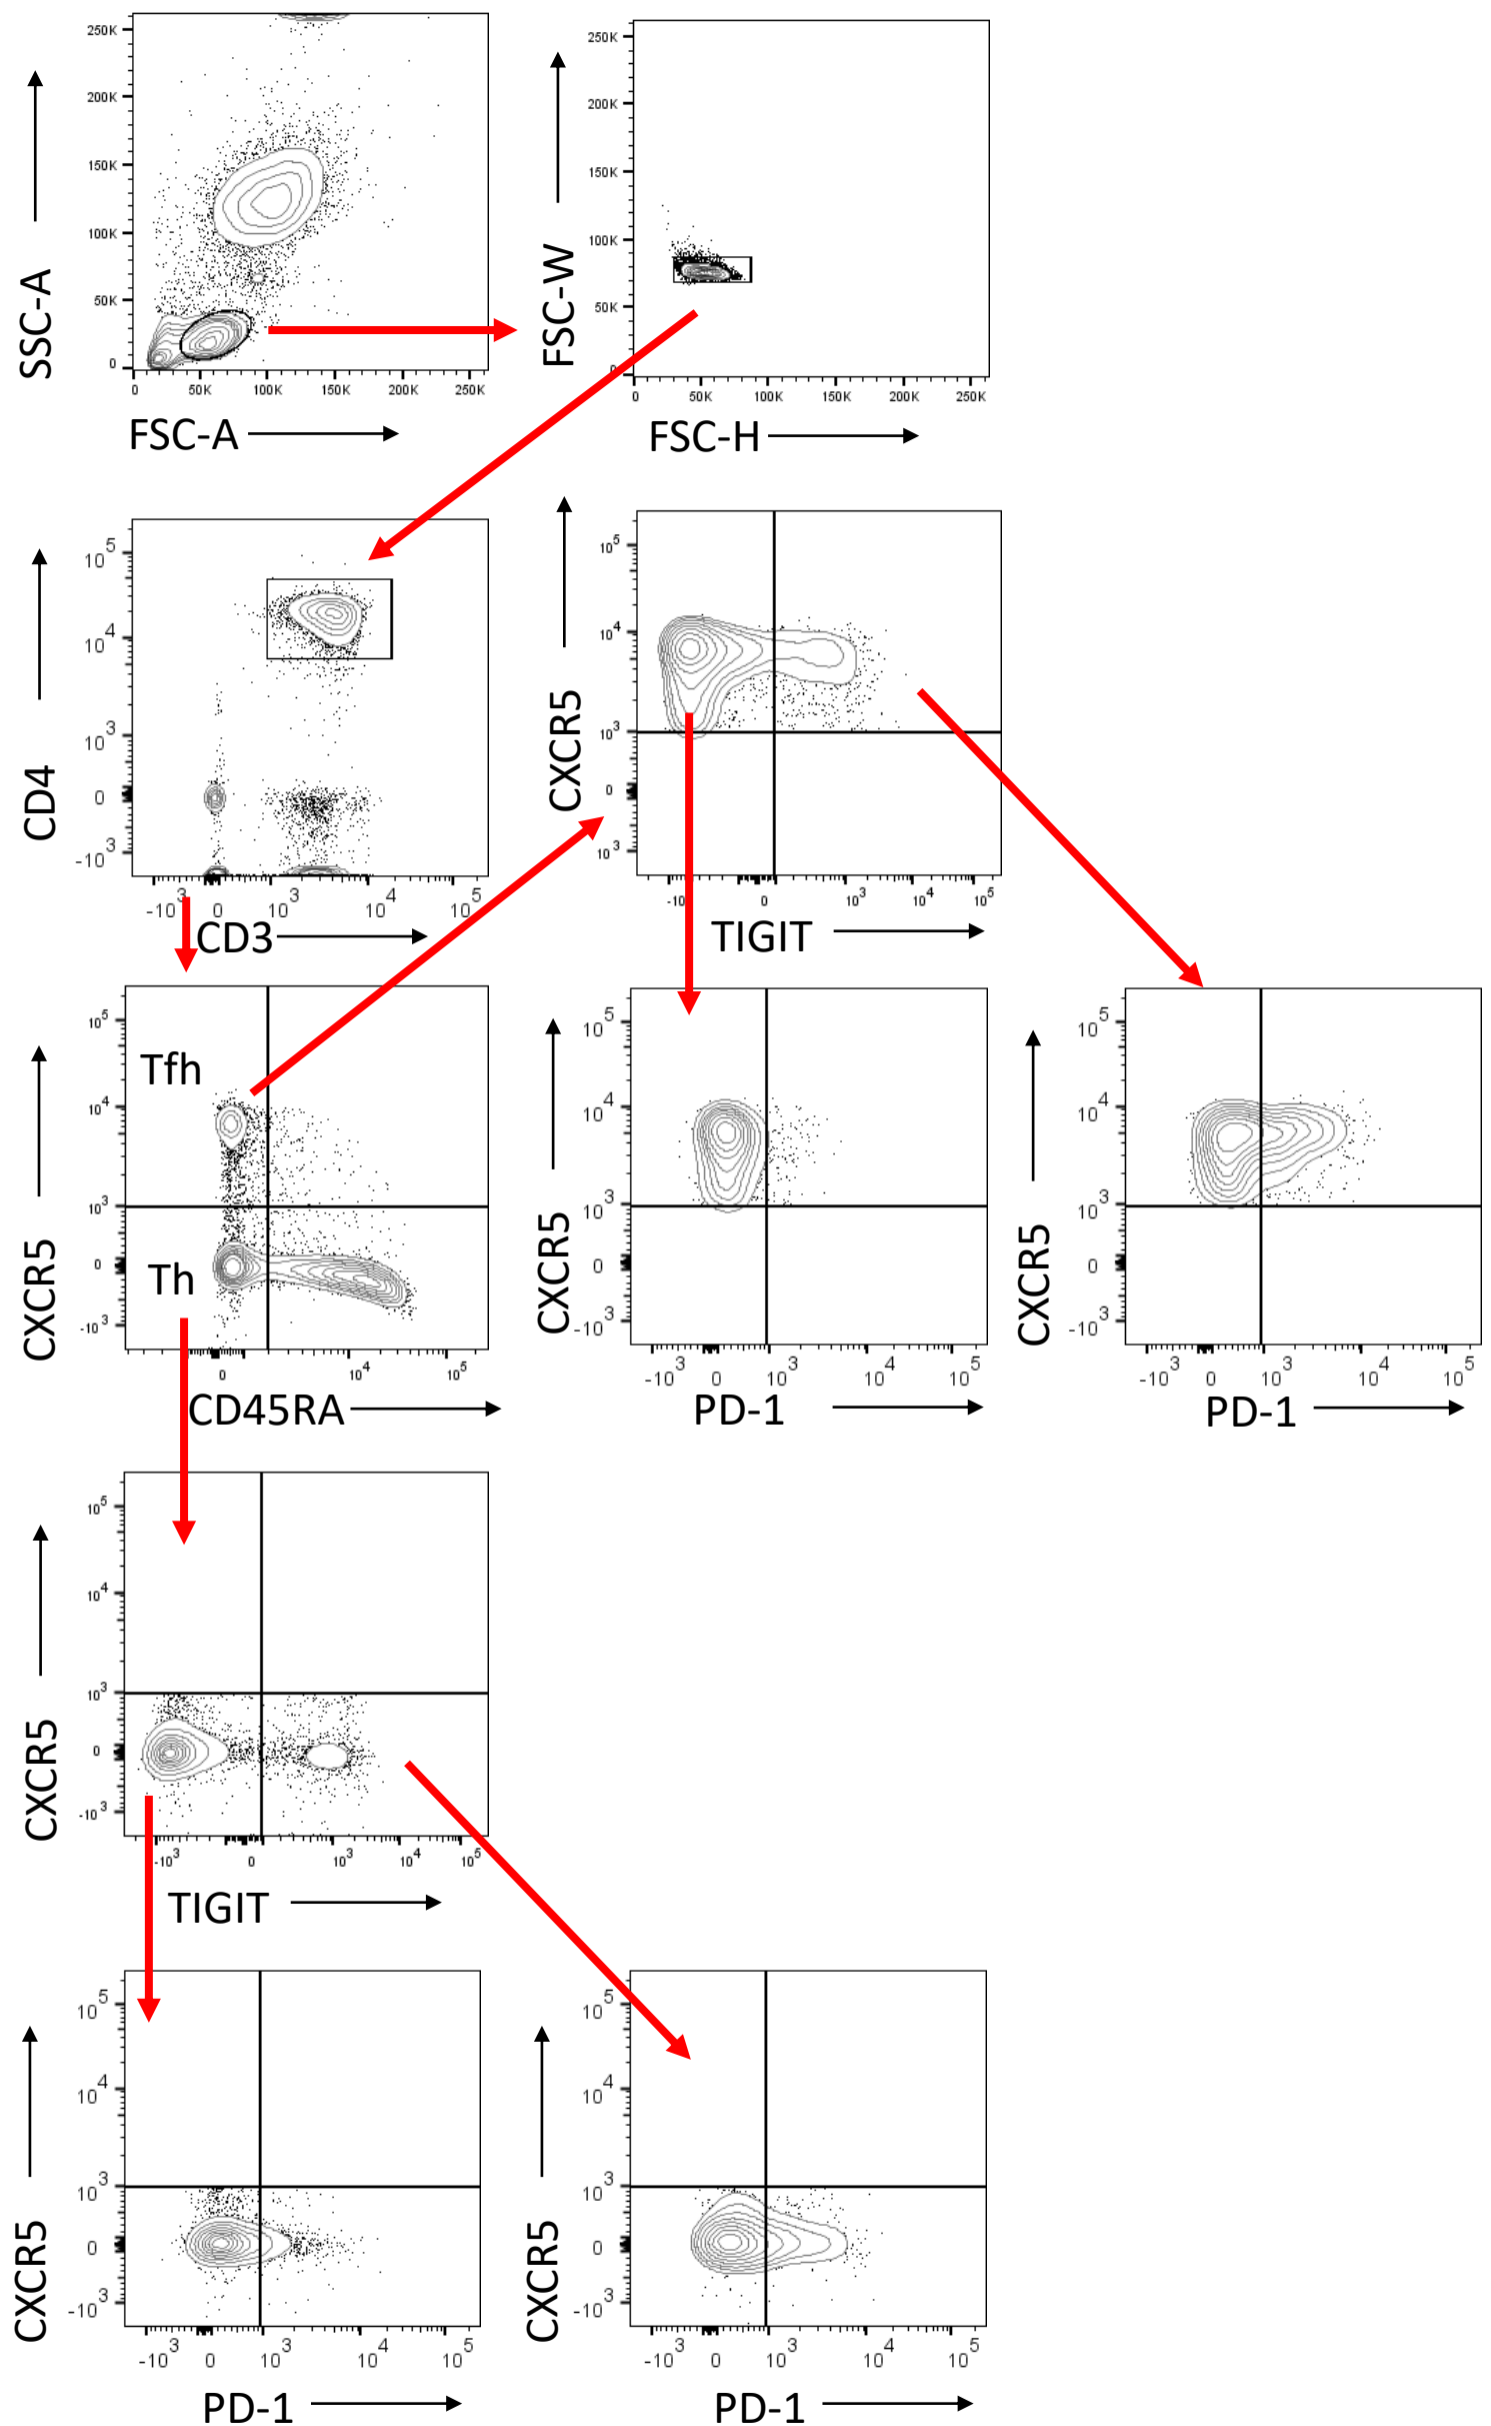

**Supplementary Figure 4. Gating strategy for PD-1+ cells in TIGIT+ and TIGIT- CD4+ T cells.**

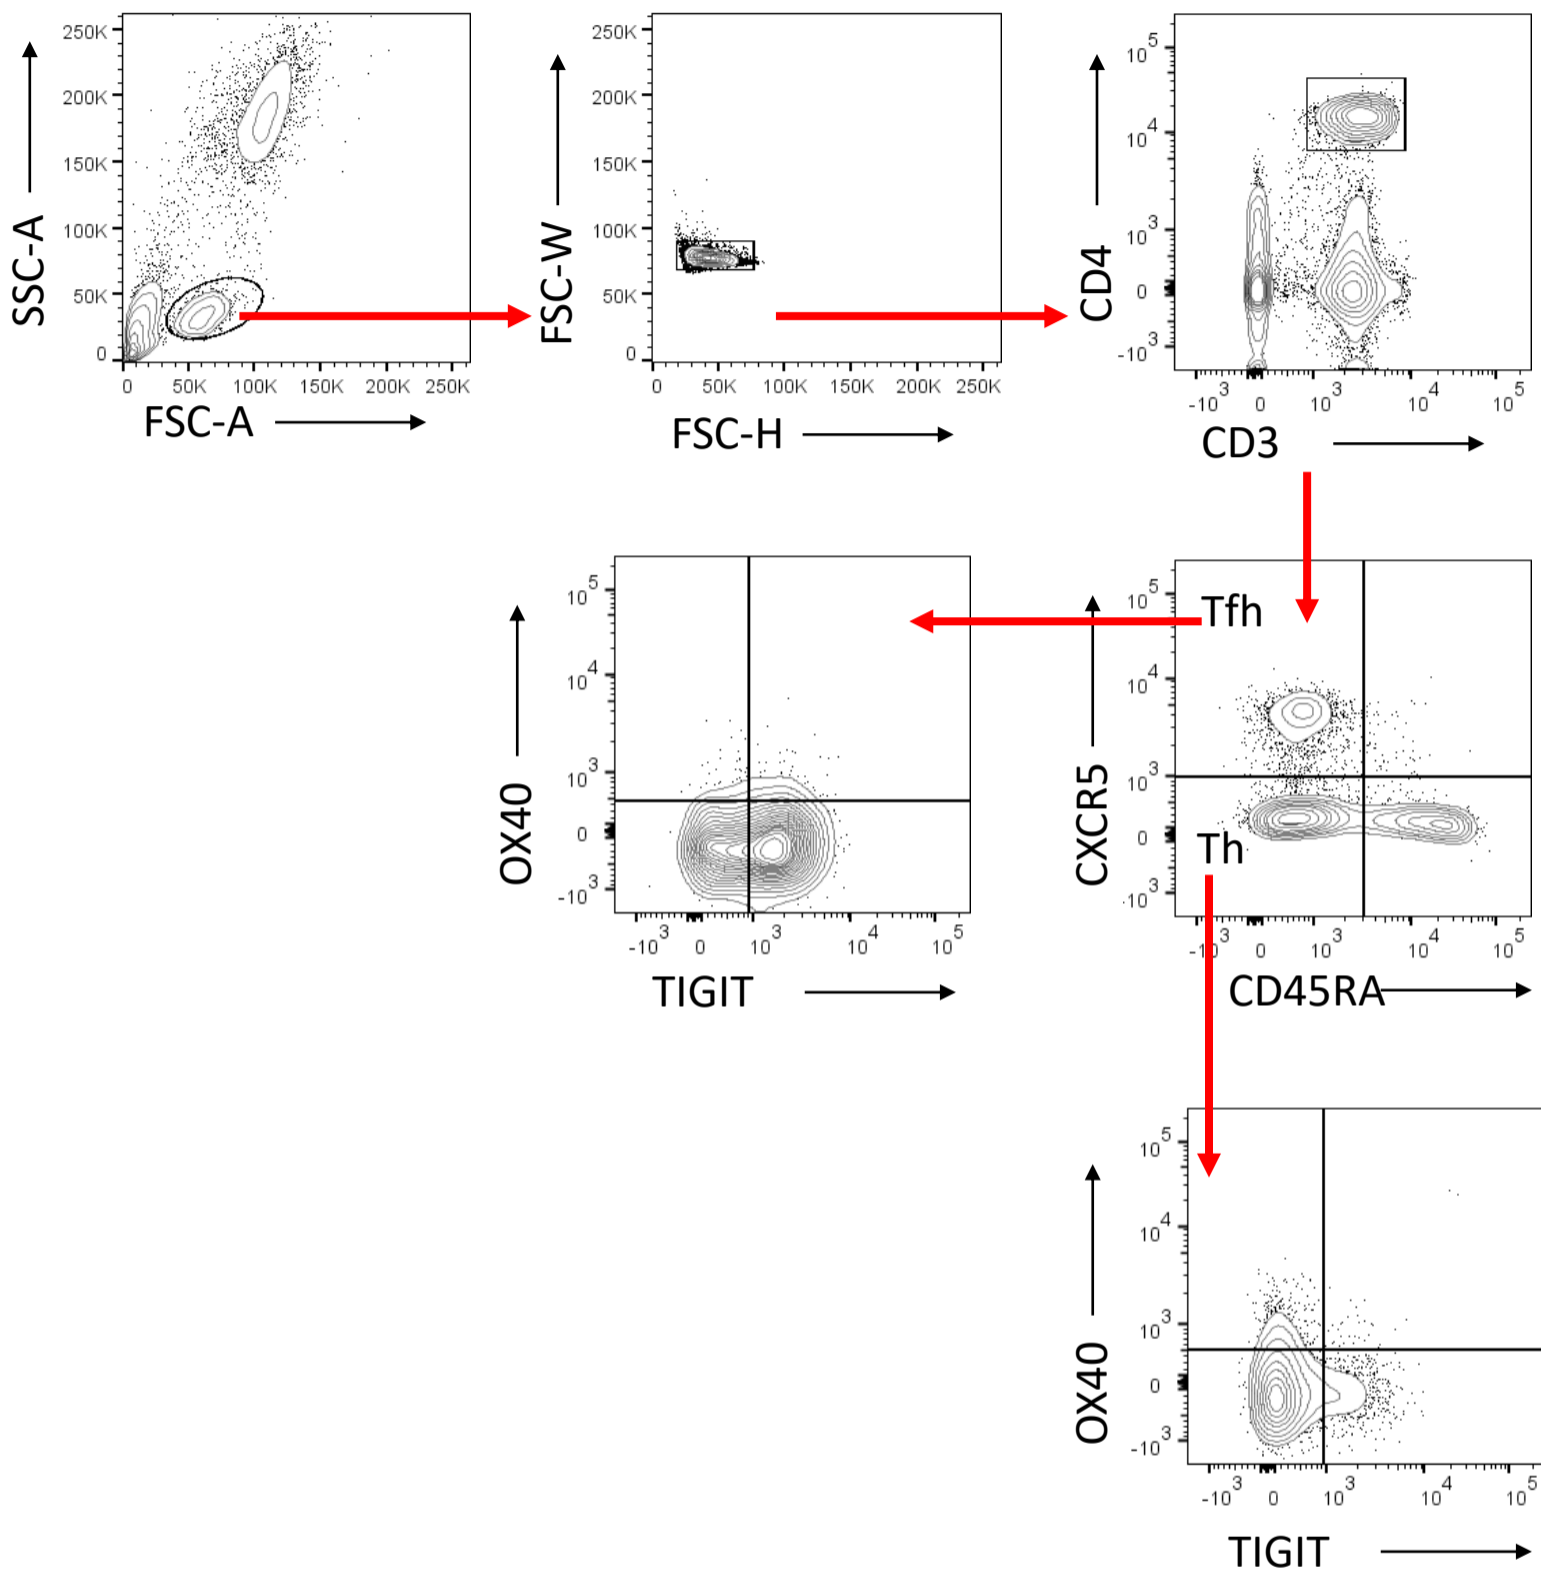

**Supplementary Figure 5. Gating strategy for OX40+ cells in TIGIT+ and TIGIT- CD4+T cells.**



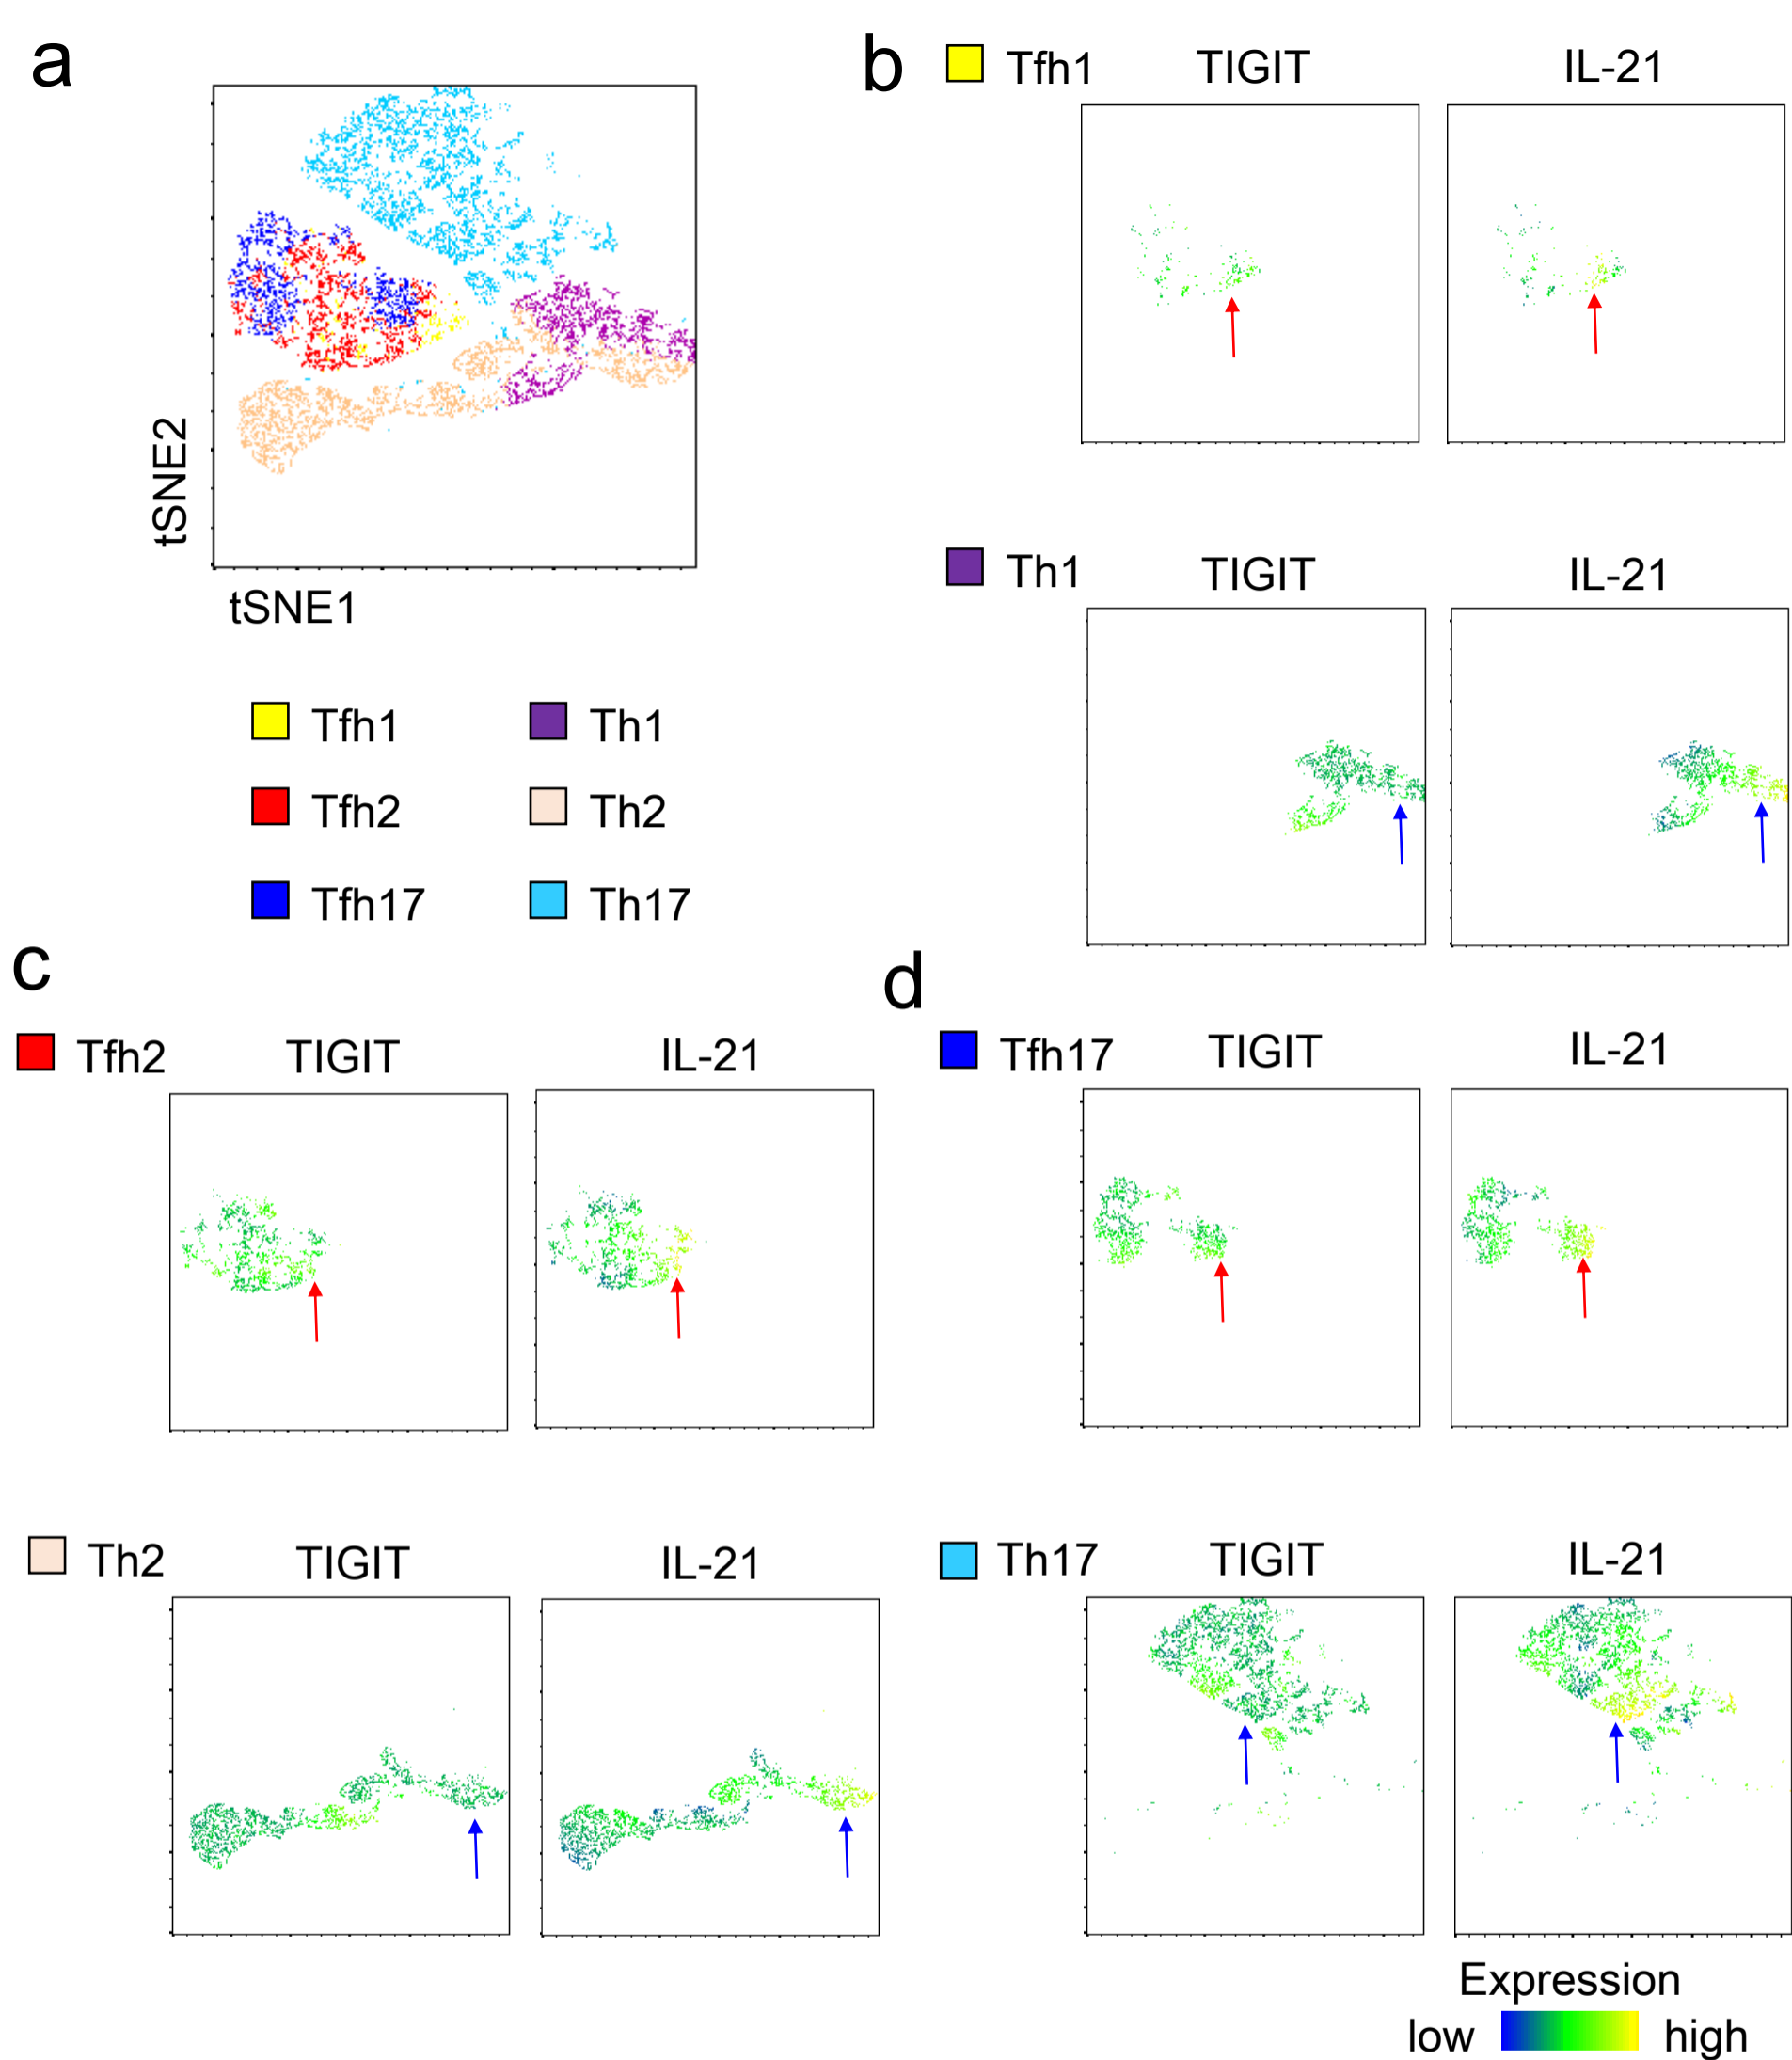

**Supplementary Figure 6. Subpopulations of TIGIT-expressing Tfh and Th cells show differential production of IL-21.**

**(a, b, c, d)** Each single cell in Tfh cell subsets (Tfh1, Tfh2, and Tfh17) and Th cell subsets (Th1, Th2, and Th17) was plotted by tSNE. Expression levels of labeled markers (TIGIT and IL-21) are shown as heat maps. Blue arrows indicate that TIGIT<sup>+</sup>Th subsets express high levels of IL-21. Red arrows indicate that TIGIT<sup>+</sup>Tfh subsets express high levels of IL-21.

## TIGIT+Tfh/TIGIT-Tfh

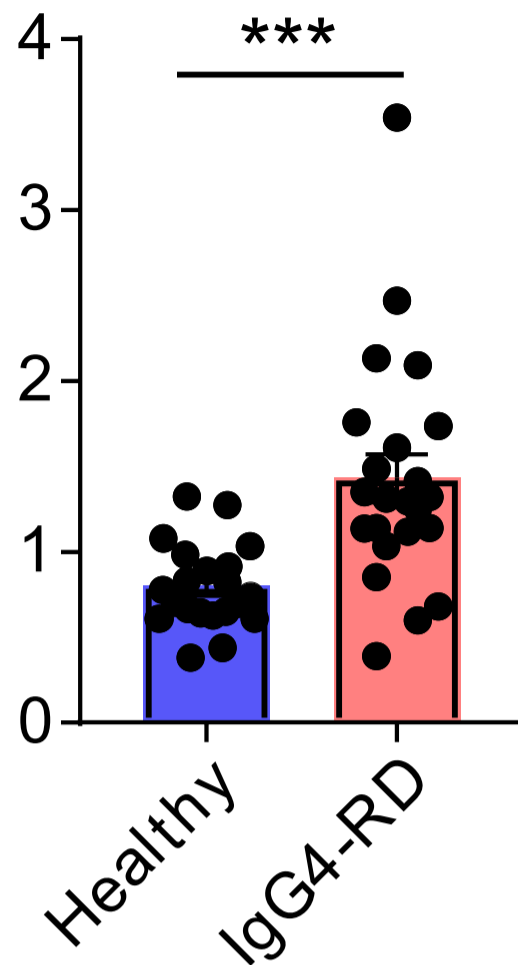

### Supplementary Figure 7. The increased ratio of TIGIT+ Tfh to TIGIT- Tfh cells in IgG4-RD.

The ratio of TIGIT+ Tfh to TIGIT- Tfh cells was examined in blood from patients with untreated, active IgG4-RD (n=23) or healthy individuals (n=21). unpaired t test. \*\*\* p<0.001.

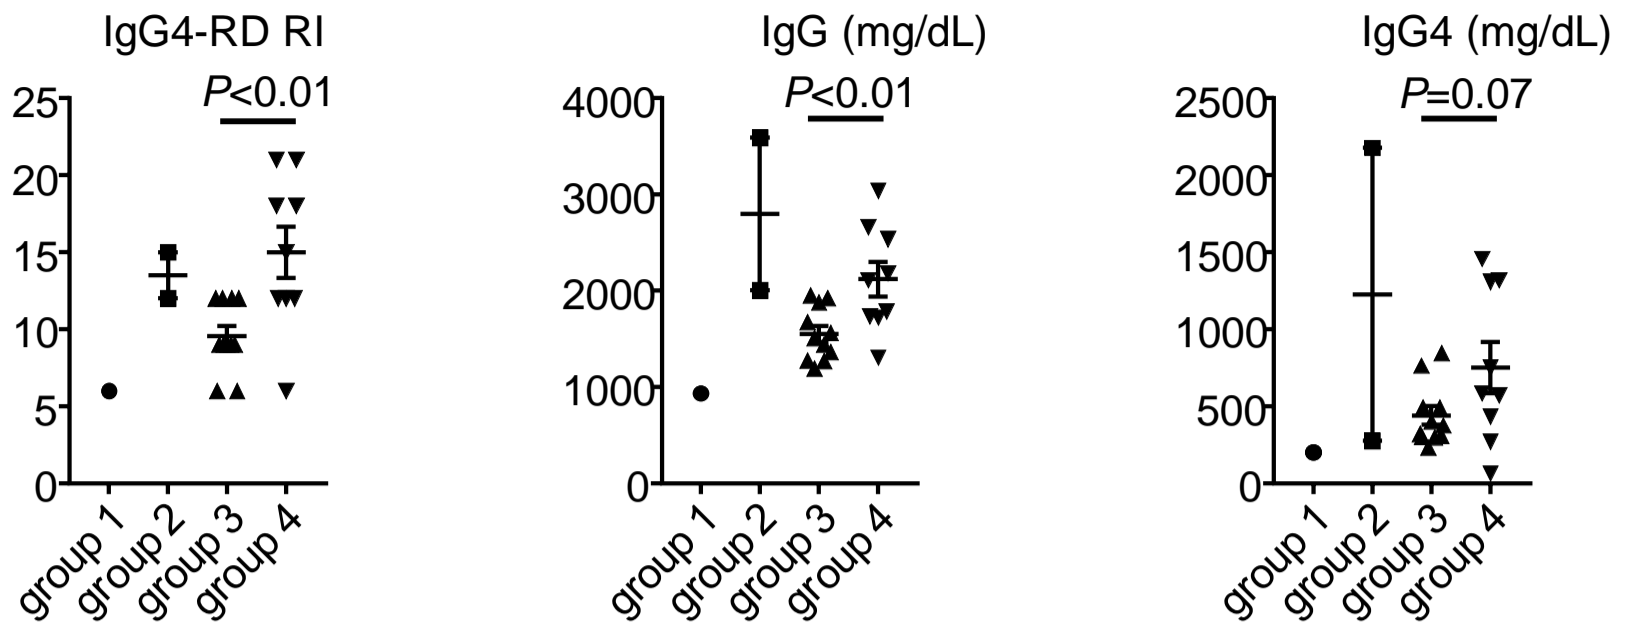

**Supplementary Figure 8. Correlation of disease activity score, serum IgG and IgG4 levels with clinical phenotypes.**

Scores of IgG4-RD RI and levels of serum IgG and IgG4 are shown relative to clinical phenotype. Statistical analysis was performed for groups 3 and 4.
